# Supplementary material for: Elucidating the reaction pathway for ethene and propene formation in the methanol-to-hydrocarbons reaction over high silica H-Beta
Source: Royal Society of Chemistry journal article supplement (doi:10.1039/c7cy00288b), 2017-01-01
Supplement: c7cy00288b1.pdf [file c7cy00288b1.pdf]

## Supporting information

# Elucidating the reaction pathway for ethene and propene formation in methanol to hydrocarbons reaction over high silica H-Beta

*Jie Zhang<sup>ab</sup>, Zhihua Huang<sup>ab</sup>, Peidong Li<sup>ab</sup>, Xiaomin Zhang<sup>a</sup>, Xinzhi Zhang<sup>a</sup>, Yangyang Yuan<sup>\*a</sup> and Lei Xu<sup>\*a</sup>*

<sup>a</sup> Dalian National Laboratory for Clean Energy, Dalian Institute of Chemical Physics, Chinese Academy of Sciences, Dalian 116023, P. R. China;

<sup>b</sup> University of Chinese Academy of Sciences, Beijing 100049, P. R. China.

**Table S1.** XRF results of H-Beta, HZSM-5, and H-SSZ-13.

| Samples | H-Beta | H-ZSM-5 | H-SSZ-13 |
|---------|--------|---------|----------|
| Si/Al   | 125    | 132     | 86       |

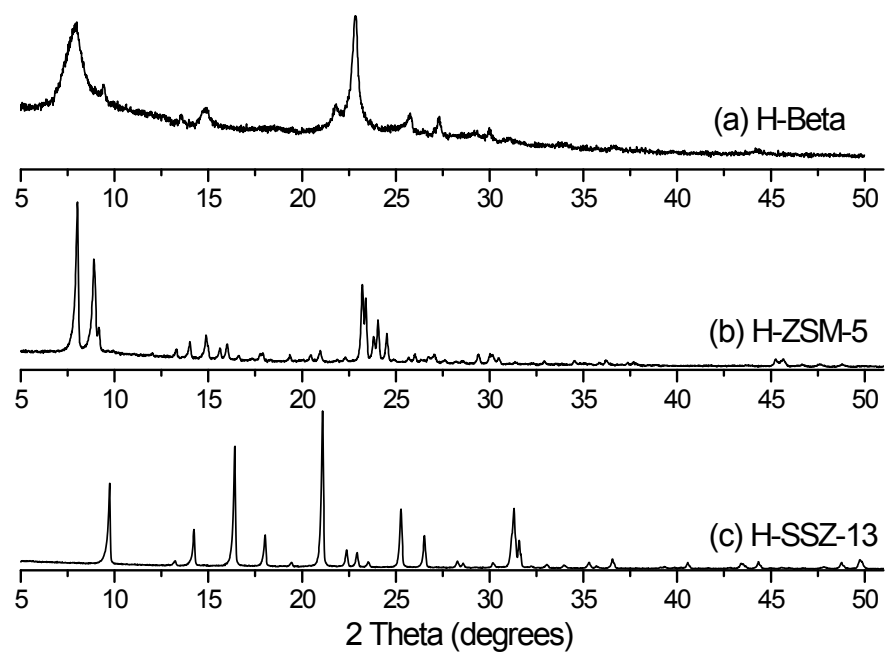

**Figure S1.** XRD patterns of H-Beta, H-ZSM-5, and H-SSZ-13 samples.

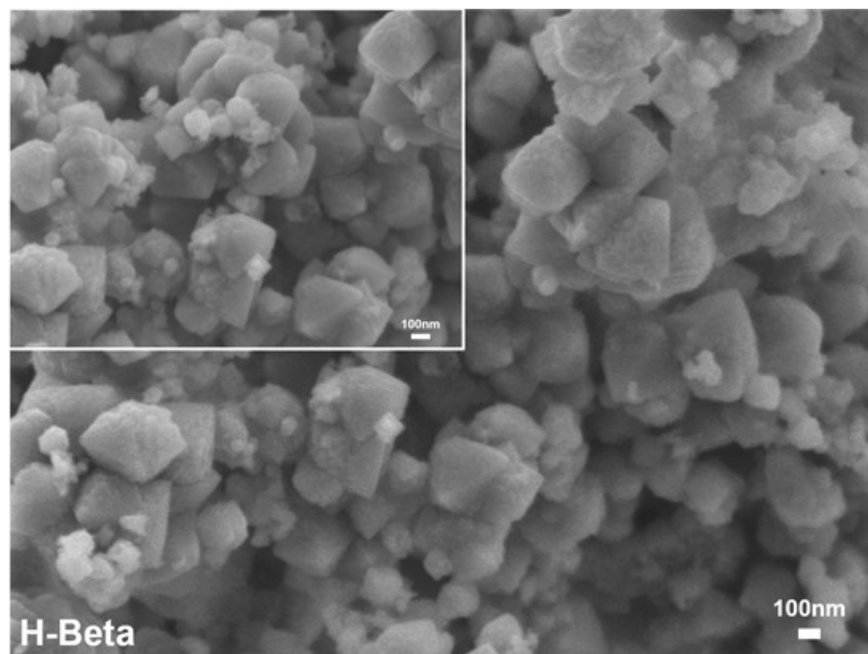

**Figure S2-1.** SEM images of H-Beta.

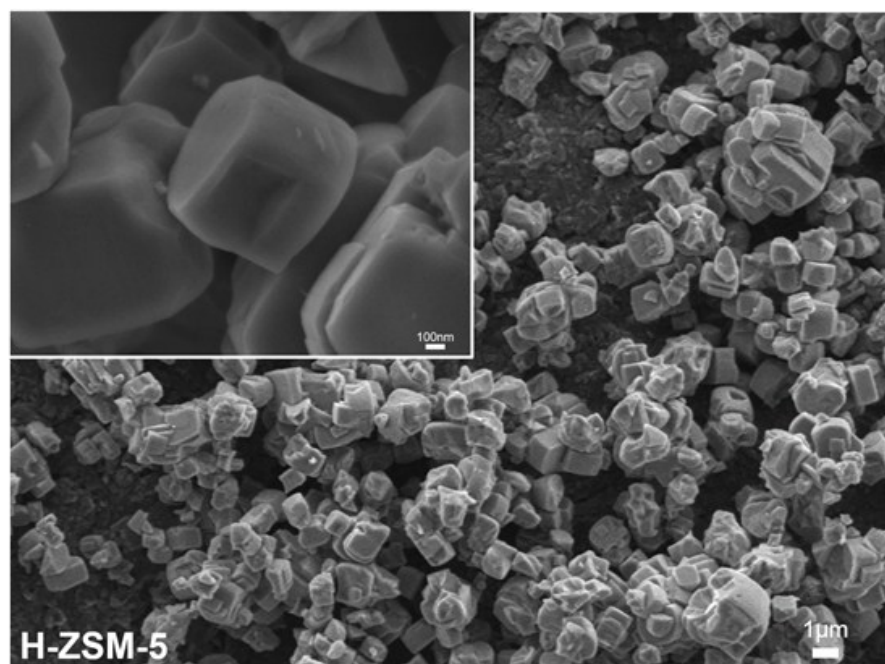

**Figure S2-2.** SEM images of H-ZSM-5.

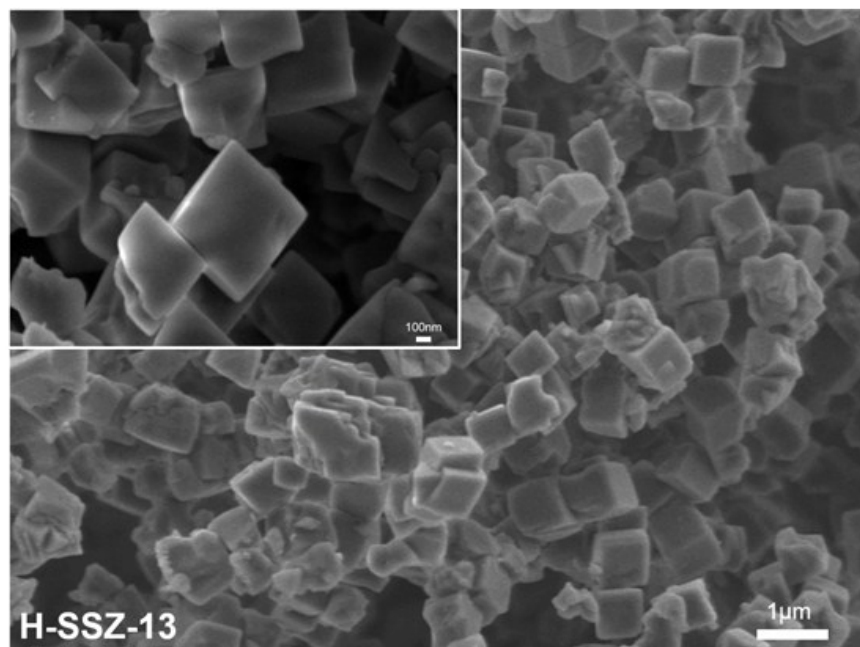

**Figure S2-3.** SEM images of H-SSZ-13.

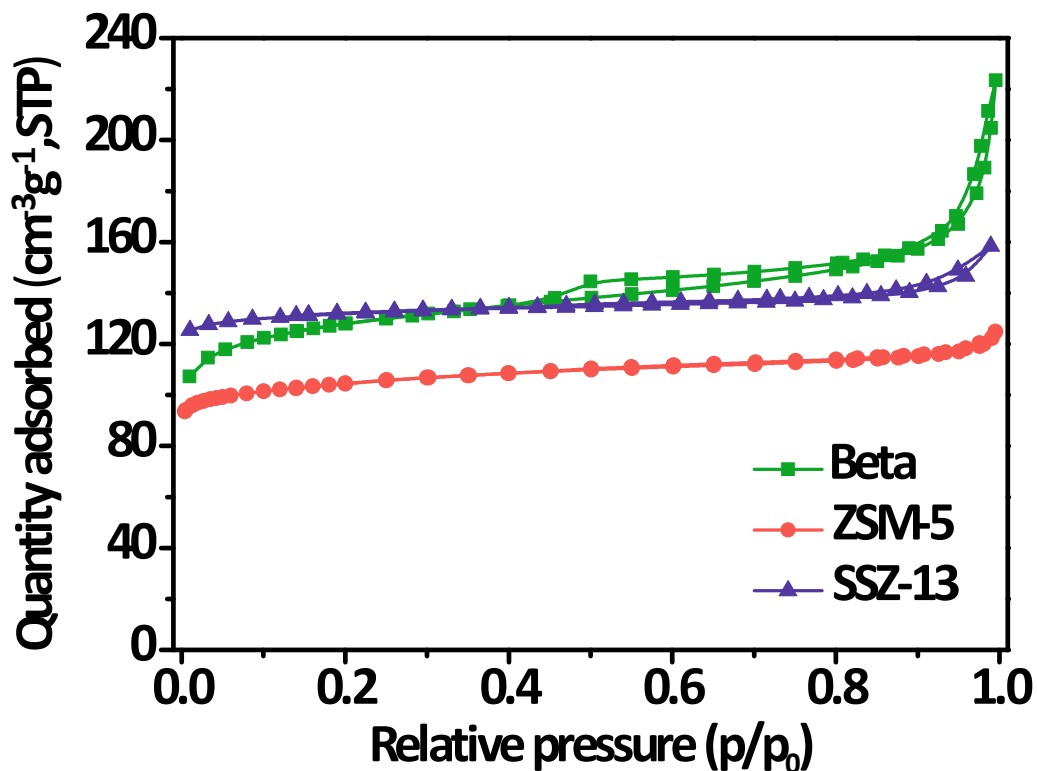

**Figure S3.** N<sub>2</sub> adsorption-desorption isotherms of H-Beta, H-ZSM-5, and H-SSZ-13.

**Table S2.** Textural properties of H-Beta, H-ZSM-5, and H-SSZ-13.

| Sample   | Surface area (m <sup>2</sup> g <sup>-1</sup> ) |                                 |                                    | Pore volume (cm <sup>3</sup> g <sup>-1</sup> ) |                                |
|----------|------------------------------------------------|---------------------------------|------------------------------------|------------------------------------------------|--------------------------------|
|          | S <sub>BET</sub> <sup>a</sup>                  | S <sub>micro</sub> <sup>b</sup> | S <sub>external</sub> <sup>b</sup> | V <sub>micro</sub> <sup>b</sup>                | V <sub>meso</sub> <sup>c</sup> |
| H-Beta   | 419                                            | 295                             | 124                                | 0.14                                           | 0.19                           |
| H-ZSM-5  | 413                                            | 345                             | 68                                 | 0.13                                           | 0.05                           |
| H-SSZ-13 | 399                                            | 363                             | 37                                 | 0.19                                           | 0.05                           |

<sup>a</sup> Surface area by Brunauer-Emmett-Teller (BET) method. <sup>b</sup> Micropore and external surface area and micropore volume by t-plot method. <sup>c</sup> Mesopore volume by Barrett-Joyner-Hallenda (BJH) method.

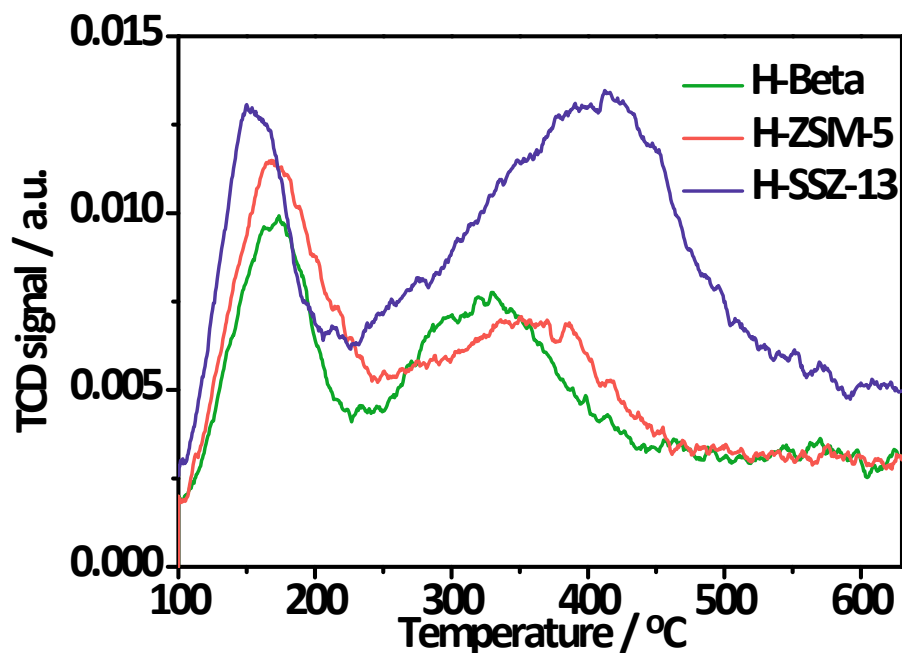

**Figure S4.** NH<sub>3</sub>-TPD spectra of H-Beta, H-ZSM-5, and H-SSZ-13.

**Table S3.** NH<sub>3</sub>-TPD data and acid amount for H-Beta, H-ZSM-5, and H-SSZ-13.

| Samples  | Si/Al <sup>a</sup> | T <sub>peak</sub> (°C) |                      | Acid amount <sup>c</sup> (μmol g <sup>-1</sup> ) |              |                |
|----------|--------------------|------------------------|----------------------|--------------------------------------------------|--------------|----------------|
|          |                    | LT peak <sup>b</sup>   | HT peak <sup>b</sup> | Total acidity                                    | Weak acidity | Strong acidity |
| H-Beta   | 125                | 168                    | 319                  | 131.4                                            | 60.0         | 71.5           |
| H-ZSM-5  | 132                | 167                    | 350                  | 157.1                                            | 79.3         | 77.8           |
| H-SSZ-13 | 86                 | 153                    | 396                  | 278.3                                            | 63.1         | 215.2          |

<sup>a</sup> The Silica-to-alumina ratio was obtained by an X-ray fluorescence spectrometer. <sup>b</sup> The LT peak represents a low temperature desorption peak. The HT peak represents a high temperature desorption peak. <sup>c</sup> Calculated with Gaussian function fit.

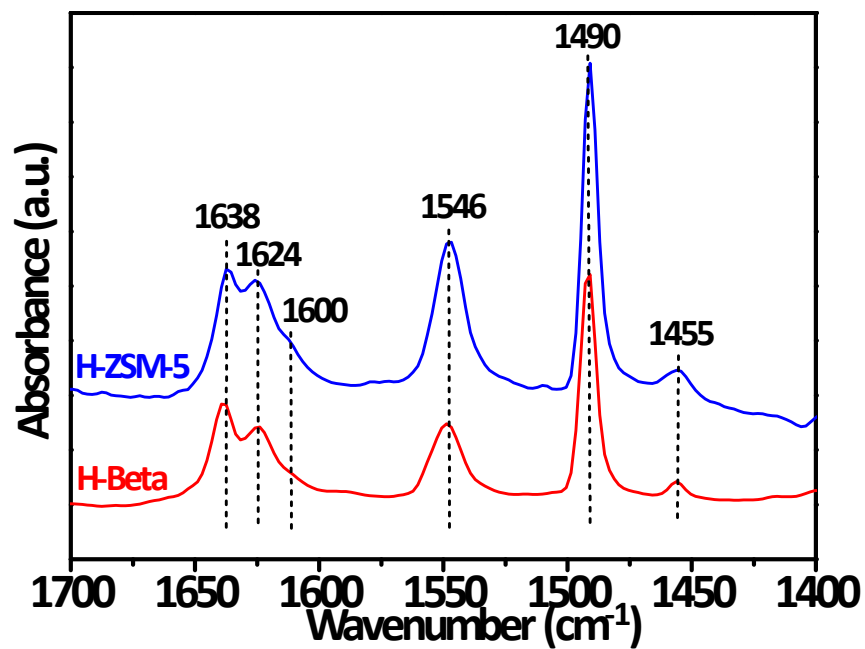

**Figure S5.** FTIR spectra of pyridine-adsorbed H-Beta, H-ZSM-5.

**Table S4.** Acidic Properties of H-Beta and H-ZSM-5.

| Sample  | Acidity by Py-IR ( $\mu\text{mol g}^{-1}$ ) <sup>a</sup> |          |       |       |
|---------|----------------------------------------------------------|----------|-------|-------|
|         | B/L                                                      | Brønsted | Lewis | total |
| H-Beta  | 10.8                                                     | 74.5     | 6.9   | 81.4  |
| H-ZSM-5 | 8.2                                                      | 90.4     | 11.0  | 101.4 |

<sup>a</sup> The quantities of Brønsted and Lewis acid sites were calculated from the Py-IR spectra.

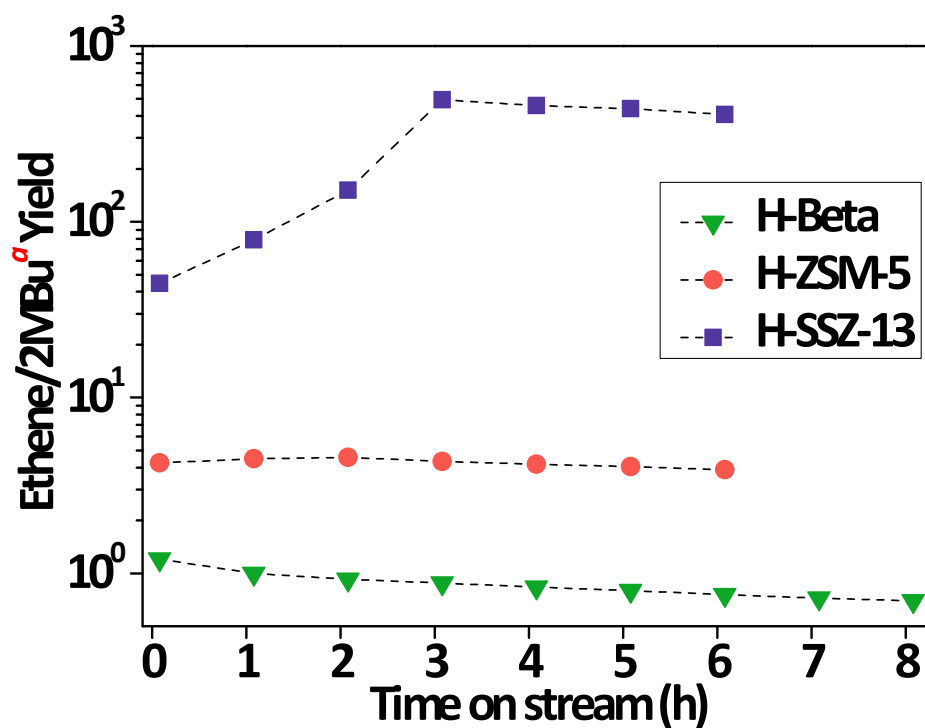

**Figure S6.** Ethene/2MBu yield versus time on stream over H-Beta, H-ZSM-5, and H-SSZ-13. Reaction condition:  $T=450\text{ }^{\circ}\text{C}$ ;  $\text{WHSV}= 2\text{ h}^{-1}$ ;  $P_{\text{MeOH}}= 17\text{ kPa}$ . <sup>a</sup> Ethene/2MBu designates the ratio of the synthesis of ethene and 2-methylbutane + 2-methyl-2-butene.

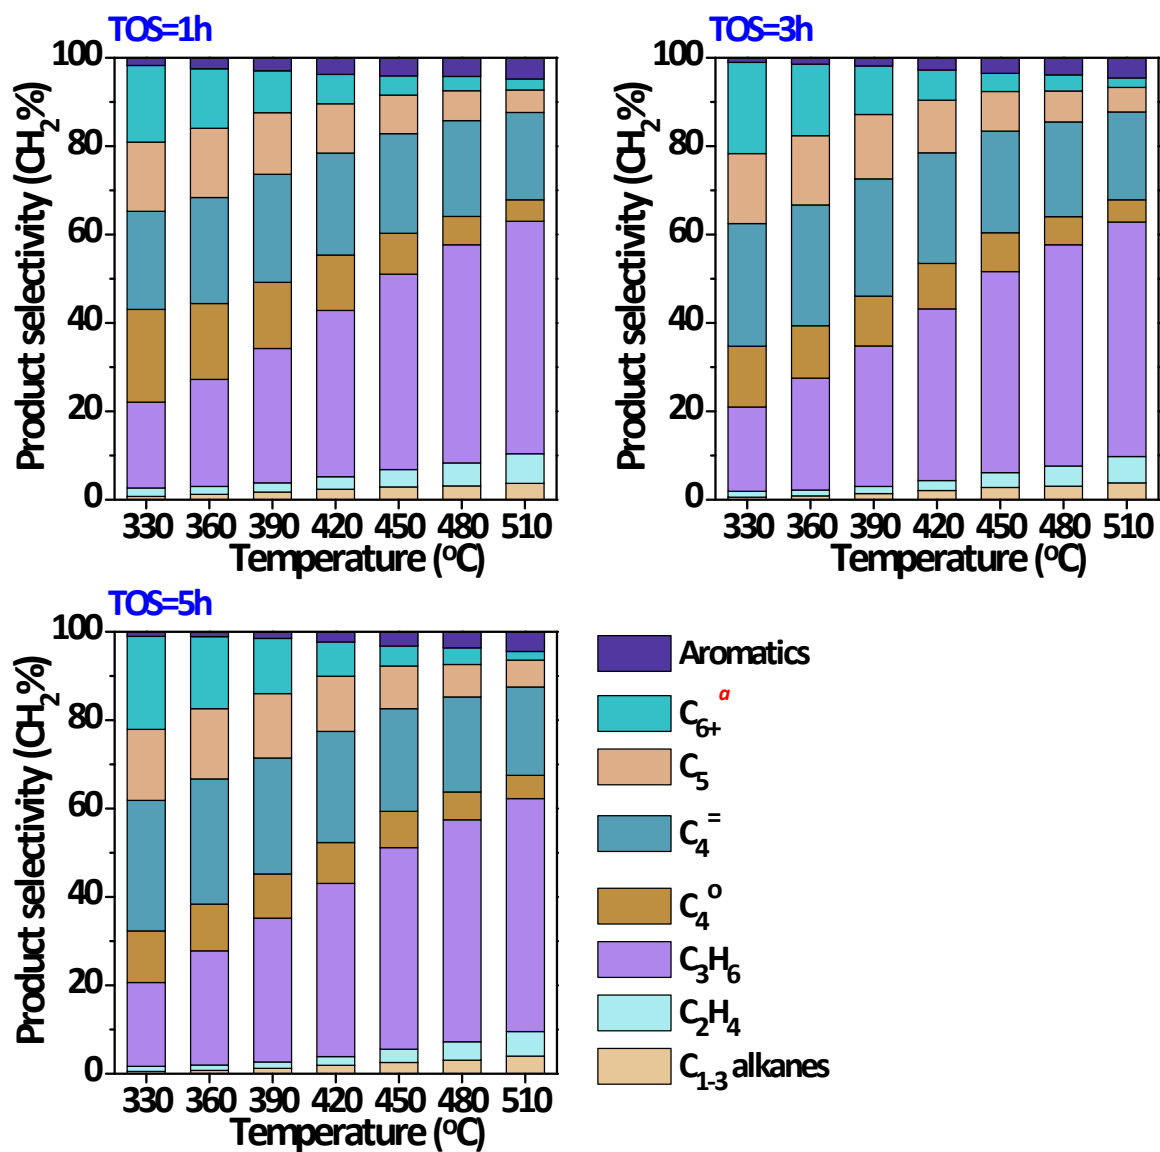

**Figure S7.** Product selectivities of methanol conversion over H-Beta after 1 h, 3 h, and 5 h on stream at different reaction temperatures. <sup>a</sup> C<sub>6+</sub> designates all aliphatic hydrocarbons with equal to or greater than six carbon atoms.

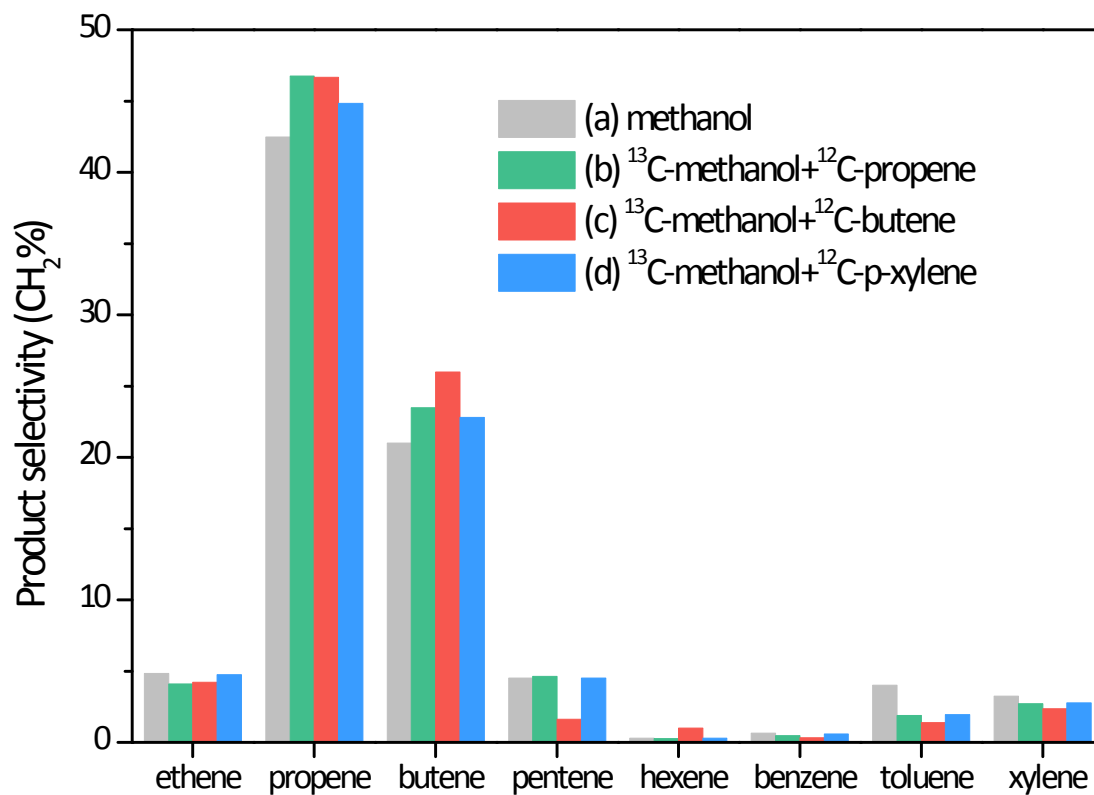

**Figure S8.** product selectivity after 8min of <sup>13</sup>C methanol reaction followed by 2min of <sup>13</sup>C methanol co-reaction with <sup>12</sup>C-propene, <sup>12</sup>C-butene, and <sup>12</sup>C-p-xylene over H-beta, H-ZSM-5 and H-SSZ-13 at 450 °C.

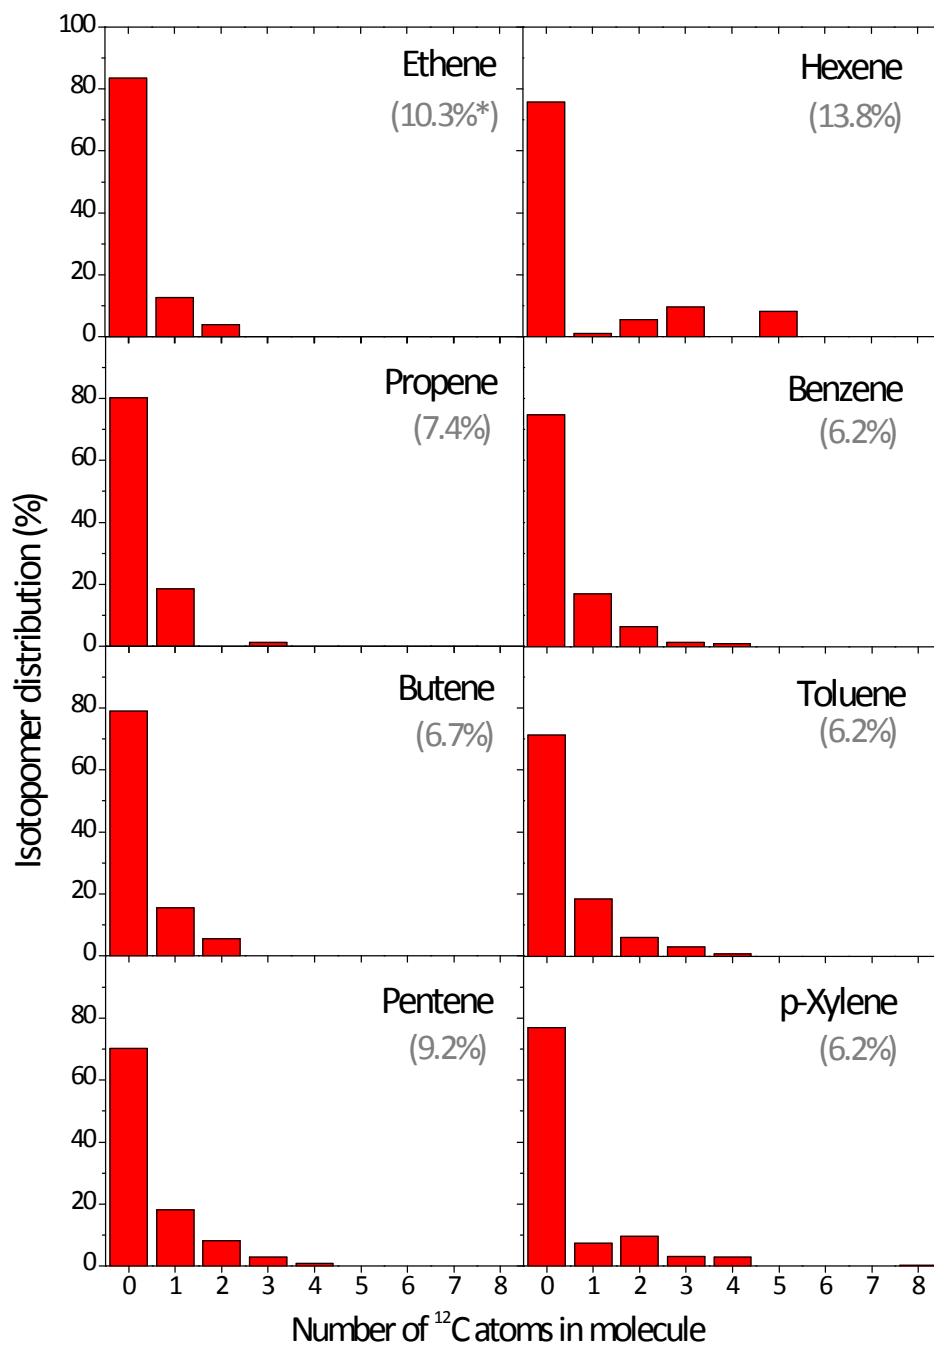

**Figure S9-1.** Isotopic distributions and total  $^{12}\text{C}$  content (number in brackets) in the effluent compounds and retained species after 8min of  $^{13}\text{C}$  methanol reaction followed by 2min of  $^{13}\text{C}$  methanol co-reaction with  $^{12}\text{C}$ -propene over H-beta at 450 °C.

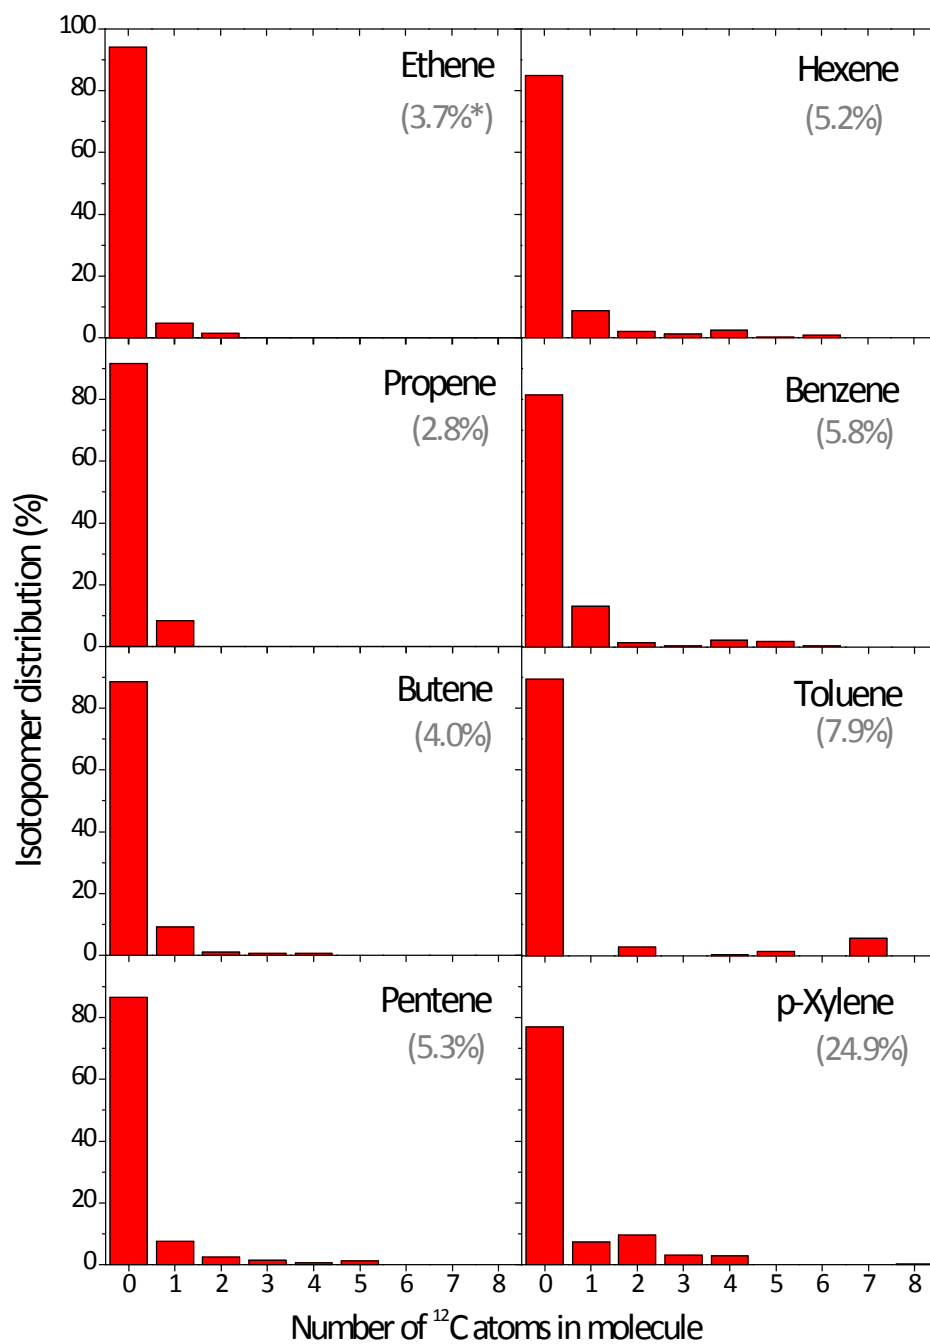

**Figure S9-2.** Isotopic distributions and total  $^{12}\text{C}$  content (number in brackets) in the effluent compounds and retained species after 8min of  $^{13}\text{C}$  methanol reaction followed by 2min of  $^{13}\text{C}$  methanol co-reaction with  $^{12}\text{C}$ -butene over H-beta at 450 °C.

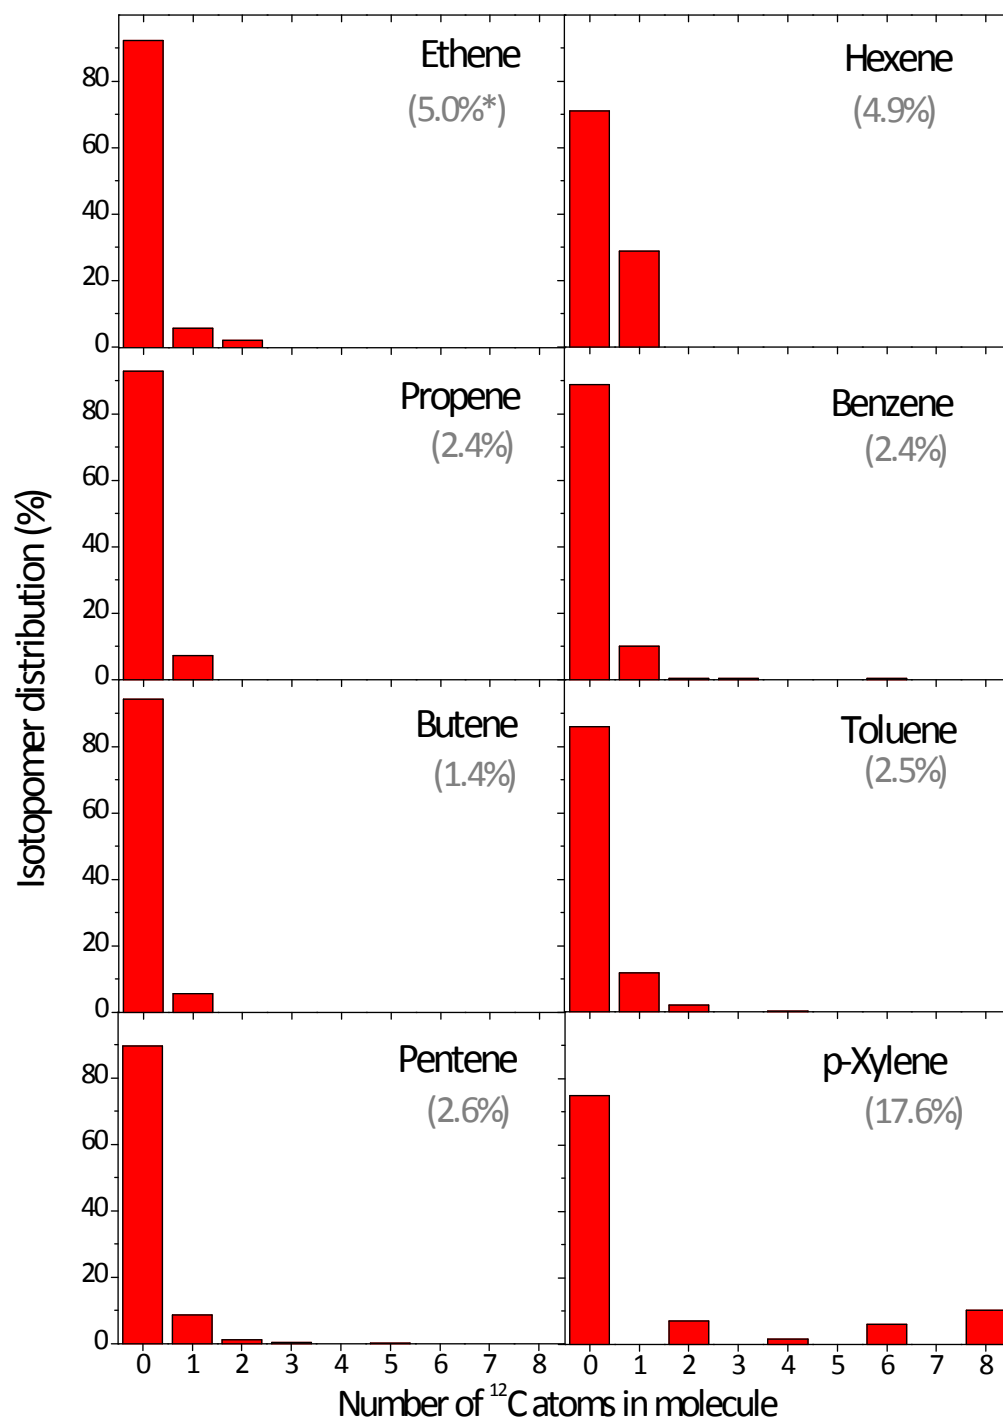

**Figure S9-3.** Isotopic distributions and total  $^{12}\text{C}$  content (number in brackets) in the effluent compounds and retained species after 8min of  $^{13}\text{C}$  methanol reaction followed by 2min of  $^{13}\text{C}$  methanol co-reaction with  $^{12}\text{C}$ -p-xylene over H-beta at 450 °C.

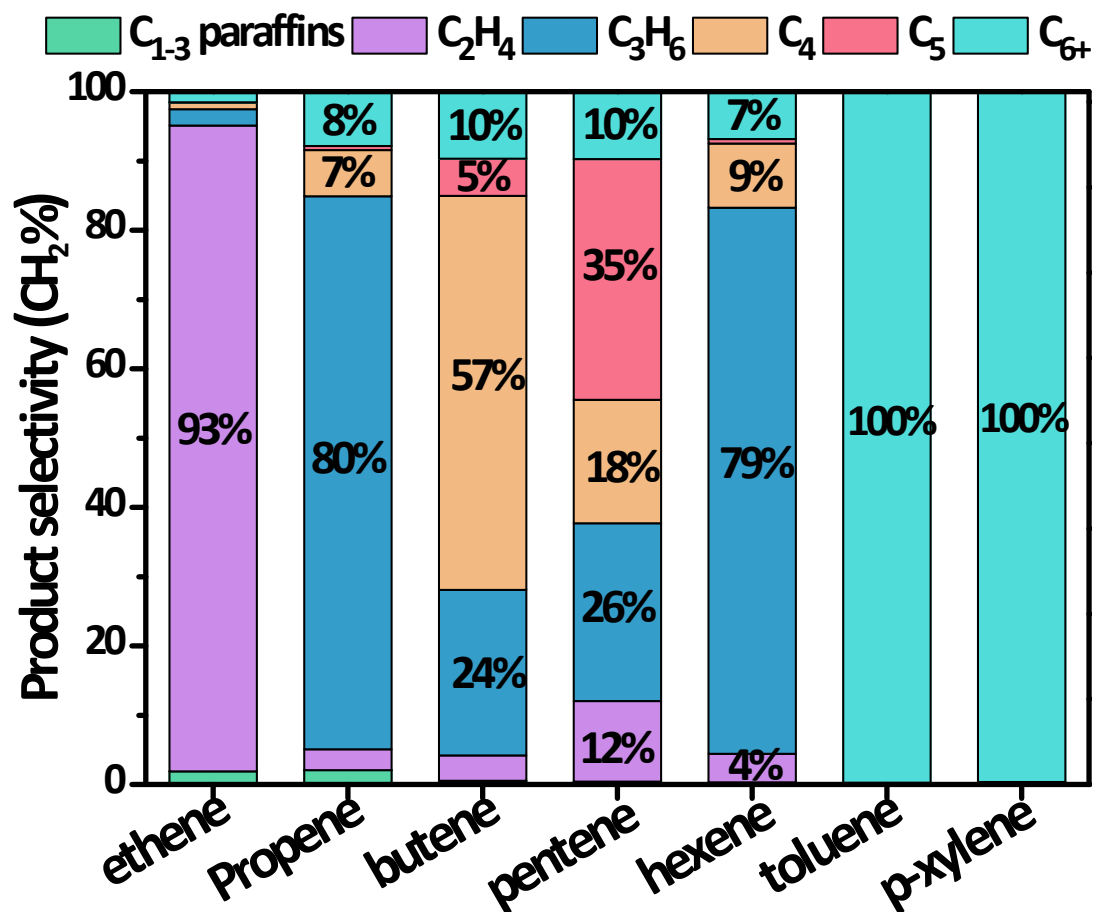

**Figure S10.** Product selectivity for C<sub>2-6</sub> olefins, toluene, and p-xylene reaction alone over H-Beta after 65 min on stream at 450 °C. The feeding rate was equivalent to 3% of methanol (WHSV=2.0 h<sup>-1</sup>) based on carbon.
